# Supplementary material for: Targeting metabolism and survival in chronic lymphocytic leukemia and Richter syndrome cells by a novel NF-κB inhibitor
Source: PubMed Central journal article supplement — Haematologica. 2017 Aug 31;102(11):1878–89. doi: 10.3324/haematol.2017.173419 (PMC5664392; doi:10.3324/haematol.2017.173419), 2017-11
Supplement: HAEMATOL_2017_173419.Vaisitti.pdf [file HAEMATOL_2017_173419.Vaisitti.pdf]

# IT-901, a novel and selective NF- $\kappa$ B inhibitor is a potential new drug in chronic lymphocytic leukemia and Richter syndrome

IT-901 

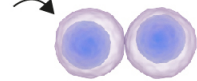

Chronic lymphocytic leukemia cells

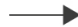

- mitochondrial reactive oxygen species  $\uparrow$
- mitochondria damage
- limit oxidative phosphorylation and ATP production activate intrinsic apoptosis

IT-901 

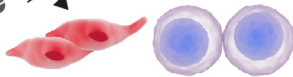

Tumor-supportive elements:  
Stromal and myeloid cells

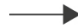

- impairs NF- $\kappa$ B-driven expression of molecules involved in cell-cell contacts and immune responses
- fails to induce apoptosis

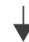

**Accessory cells do not protect chronic lymphocytic leukemia cells from IT-901-induced apoptosis**

IT-901 

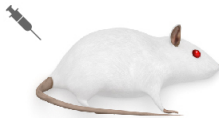

Xenograft models  
Chronic lymphocytic leukemia  
Richter syndrome patients

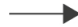

- NF- $\kappa$ B inhibition
- tumor burden reduction
